# Supplementary material
Source: PubMed Central journal article supplement (PMC5682559)
Supplement: NIHMS902225-supplement-Table_S1.pdf [file NIHMS902225-supplement-Table_S1.pdf]

**Supplementary Table S1. Socio-demographic and clinical characteristics of participants according to gait speed**

|                                        | <b>Fast walk<br/>n=830</b> | <b>Slow walk<br/>n=184</b> | <b>p-value</b> |
|----------------------------------------|----------------------------|----------------------------|----------------|
| Age, y, mean (SD)                      | 72.3 (6.2)                 | 81.1 (7.6)                 | <0.001         |
| Median (IQ range)                      | 71 (67;76)                 | 82 (76;87)                 |                |
| Female, number (%)                     | 429 (51.7)                 | 137 (74.5)                 | <0.001         |
| Education, y, mean (SD)                | 5.8 (3.4)                  | 4.0 (2.3)                  | <0.001         |
| Median (IQ range)                      | 5 (4;6)                    | 4 (3;5)                    |                |
| BMI                                    | 27.4 (3.9)                 | 28.3 (5.0)                 | <0.001         |
| Smoking, number (%)                    | 367 (44.2)                 | 47 (25.5)                  | <0.001         |
| Alcohol, number (%)                    | 629 (76.2)                 | 107 (58.8)                 | <0.001         |
| Hypertension, number (%)               | 497 (59.9)                 | 139 (75.5)                 | <0.001         |
| Atrial fibrillation, number (%)        | 17 (2.1)                   | 11 (6.0)                   | 0.003          |
| Cerebrovascular disease,<br>number (%) | 39 (4.7)                   | 29 (15.8)                  | <0.001         |
| Diabetes, number (%)                   | 88 (10.6)                  | 32 (17.4)                  | 0.010          |
| CESD score, mean (SD)                  | 11.4 (8.0)                 | 17.8 (9.6)                 | 0.002          |
| Median (IQ range)                      | 10 (6;16)                  | 17 (10;24)                 |                |
