# Supplementary material
Source: PubMed Central journal article supplement (PMC5682559)
Supplement: NIHMS902225-supplement-Table_S2.pdf [file NIHMS902225-supplement-Table_S2.pdf]

**Supplementary Table S2. Socio-demographic and clinical characteristics of participants according to the recall memory score**

|                                     | <b>Good memory<br/>(2-3 recalls)<br/>n=581</b> | <b>Poor memory<br/>(0-1 recall)<br/>n=433</b> | <b>p-value</b> |
|-------------------------------------|------------------------------------------------|-----------------------------------------------|----------------|
| Age, y, mean (SD)                   | 72.3 (6.6)                                     | 75.9 (7.8)                                    | <0.001         |
| Median (IQ range)                   | 71 (67;76)                                     | 75 (69;82)                                    |                |
| Female, number (%)                  | 329 (56.6)                                     | 237 (54.7)                                    | 0.548          |
| Education, y, mean (SD)             | 6.1 (3.7)                                      | 4.7 (2.5)                                     | <0.001         |
| Median (IQ range)                   | 5 (4;7)                                        | 5 (3;5)                                       |                |
| BMI                                 | 27.4 (4.0)                                     | 27.7 (4.2)                                    | 0.221          |
| Smoking, number (%)                 | 262 (45.1)                                     | 152 (35.1)                                    | 0.001          |
| Alcohol, number (%)                 | 435 (75.1)                                     | 301 (70.2)                                    | 0.079          |
| Hypertension, number (%)            | 357 (61.5)                                     | 279 (64.4)                                    | 0.330          |
| Atrial fibrillation, number (%)     | 10 (1.7)                                       | 18 (4.2)                                      | 0.019          |
| Cerebrovascular disease, number (%) | 30 (5.2)                                       | 38 (8.8)                                      | 0.023          |
| Diabetes, number (%)                | 68 (11.7)                                      | 52 (12.0)                                     | 0.882          |
| CESD score, mean (SD)               | 12.2 (8.4)                                     | 13 (8.9)                                      | 0.166          |
| Median (IQ range)                   | 10 (6;17)                                      | 11 (6;18.5)                                   | 0.192          |
